# Supplementary material for: A channel-structured Eu-based metal–organic framework with a zwitterionic ligand for selectively sensing Fe3+ ions
Source: Royal Society of Chemistry journal article supplement (doi:10.1039/c8ra02809e), 2018-01-01
Supplement: c8ra02809e1.pdf [file c8ra02809e1.pdf]

## **A channel-structured Eu-based metal-organic framework with a zwitterionic ligand for selectively sensing Fe<sup>3+</sup> ion**

Yong-Qing Huang,<sup>\*a</sup> Huai-Ying Chen,<sup>a</sup> Yang Wang,<sup>a</sup> Yong-He Ren,<sup>a</sup> Zong-Ge Li,<sup>a</sup> Lu-Chao Li<sup>a</sup> and Yan Wang<sup>b</sup>

<sup>a</sup>State Key Laboratory of Mining Disaster Prevention and Control Co-founded by Shandong Province and the Ministry of Science and Technology, College of Chemical and Environmental Engineering, Shandong University of Science and Technology, Qingdao 266590, China

<sup>b</sup>School of Chemistry and Chemical Engineering, Anhui Key Laboratory of Functional Coordination Compounds, Anqing Normal University, Anqing 246011, China.

**Corresponding Author:**

**Dr. Yong-Qing Huang**

**Email: [yquangskd@163.com](mailto:yquangskd@163.com)**

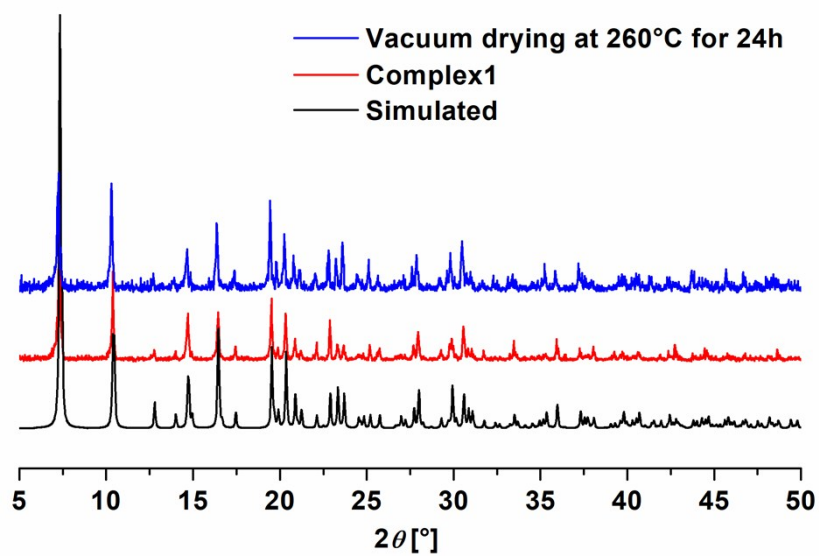

Fig. S1 Powder X-ray diffraction (PXRD) pattern of complex 1.

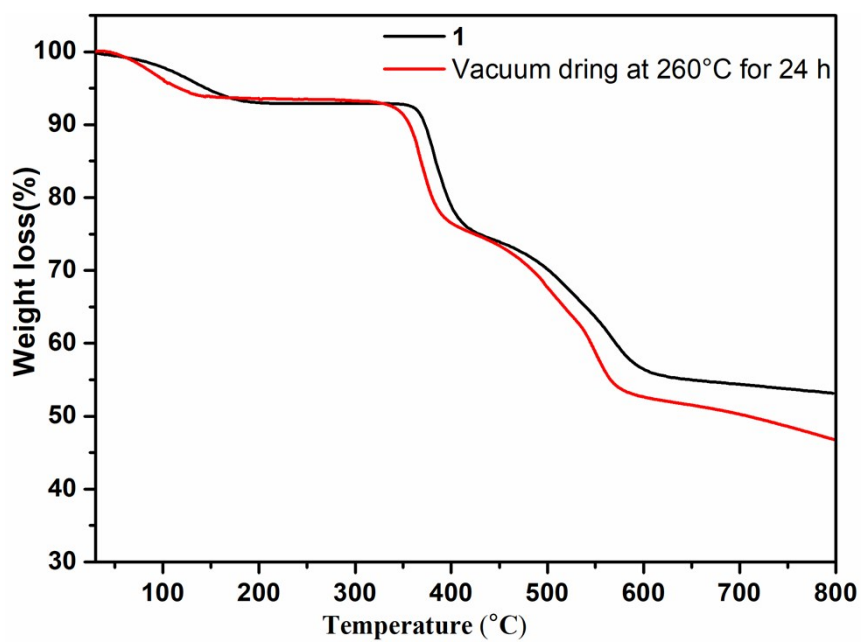

Fig. S2 TGA plots of complex 1.

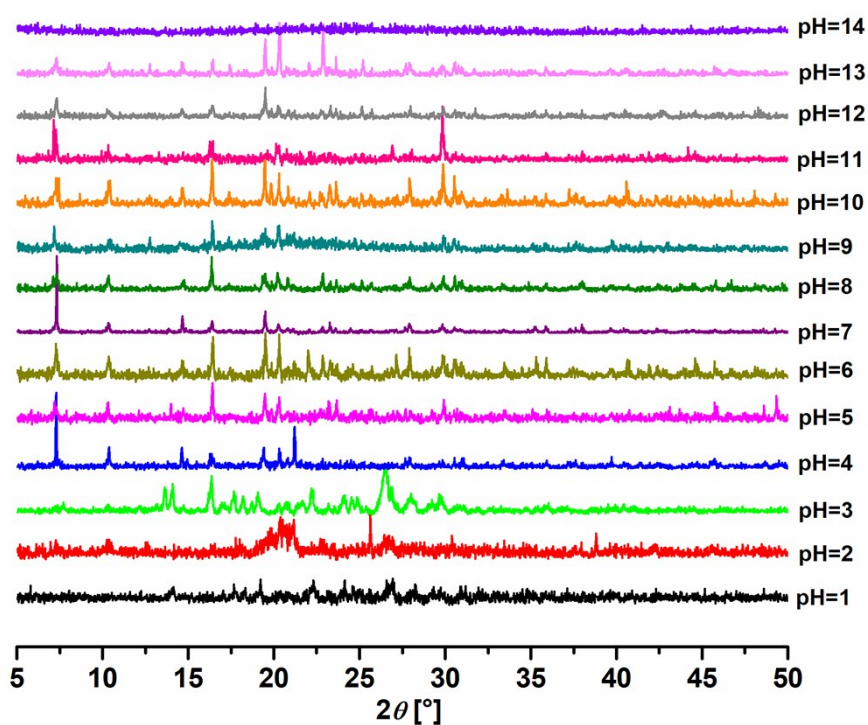

Fig. S3 Powder X-ray diffraction (PXRD) pattern of complex 1 in aqueous solution with different pH value.

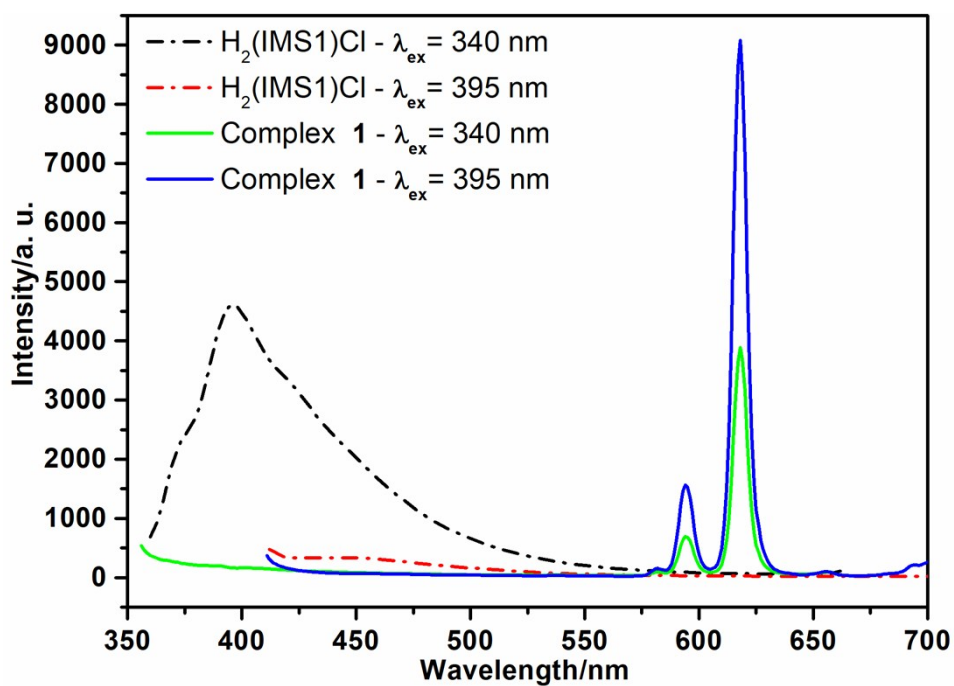

Fig. S4 The solid-state fluorescence spectra of ligand  $H_2(IMS1)Cl$  and complex 1 upon the excitation at 340 nm and 395 nm, respectively.

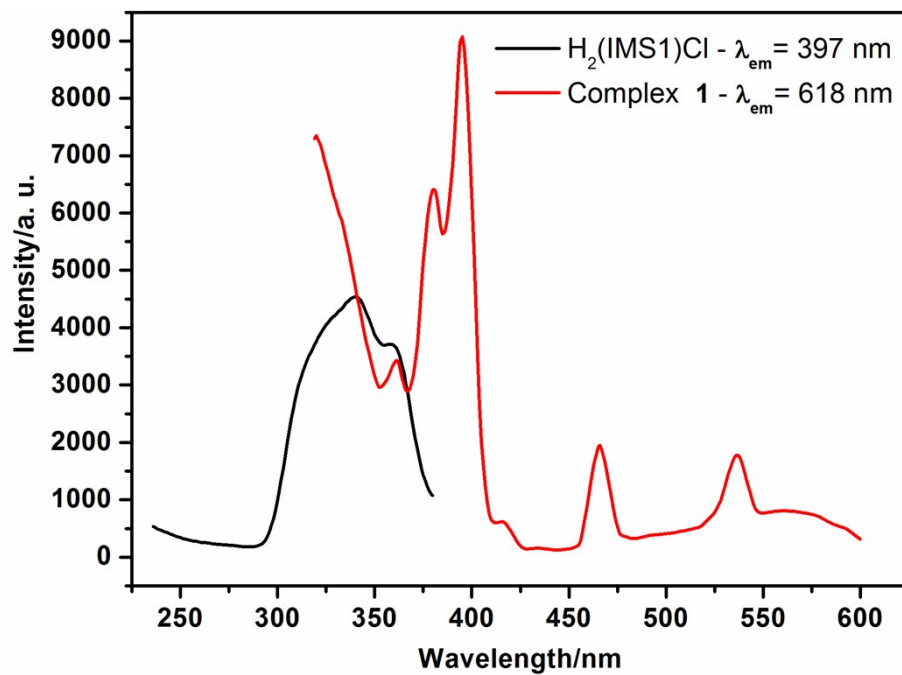

**Fig. S5** The solid-state excitation spectra of ligand H<sub>2</sub>(IMS1)Cl and complex **1** upon the emission at 397 nm and 618 nm, respectively.

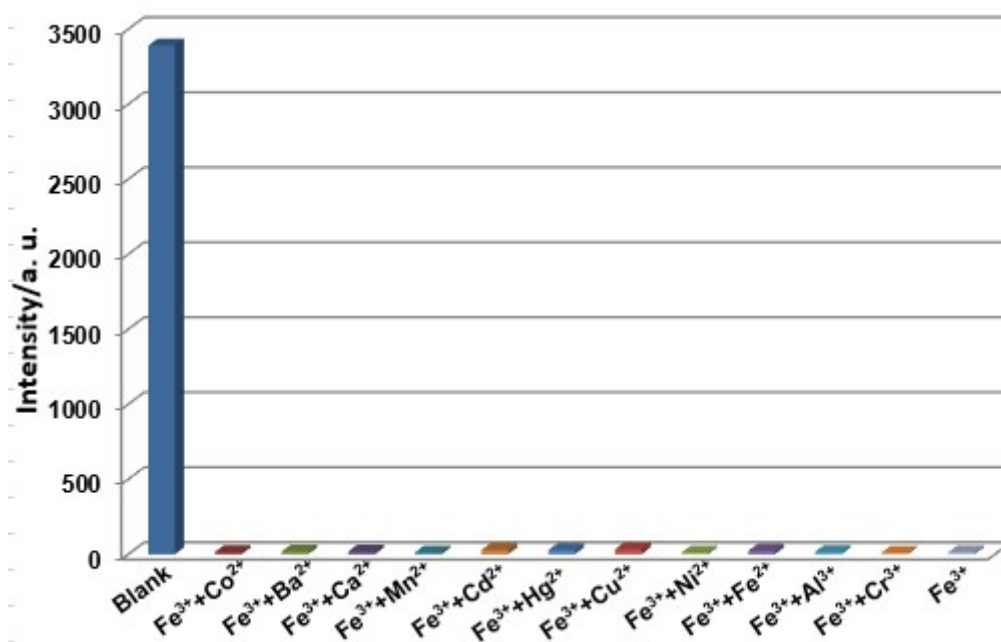

**Fig. S6** Fluorescence response of **1** towards 0.1 M Fe<sup>3+</sup> and different metal cations upon the excitation at 395 nm.

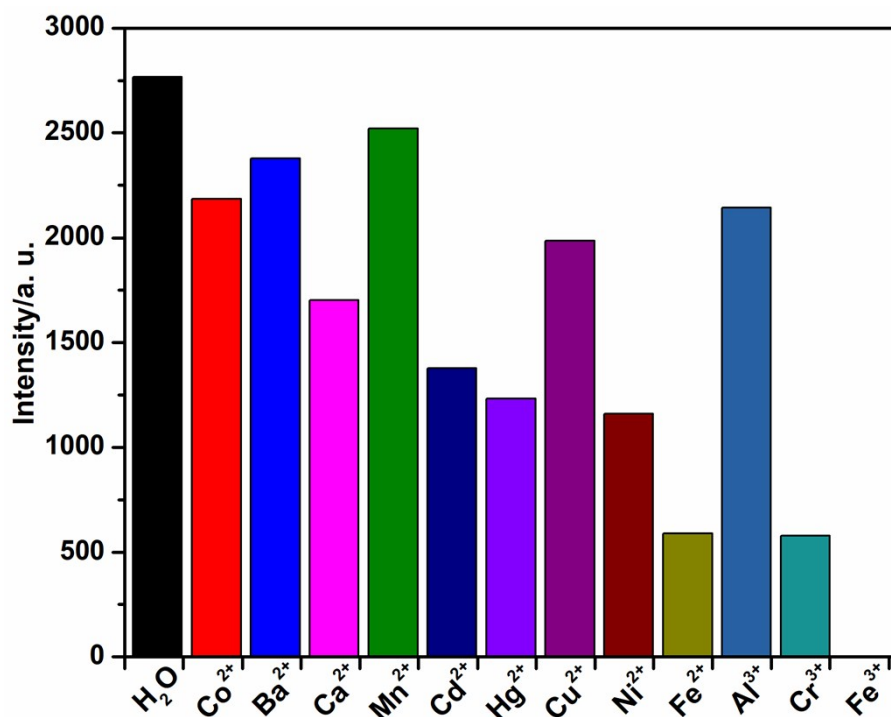

**Fig.S7** Comparison of the luminescence intensity of ligand H<sub>2</sub>(IMS1)Cl in different MCl<sub>x</sub> aqueous solutions (0.1 M) upon excitation at 340 nm.

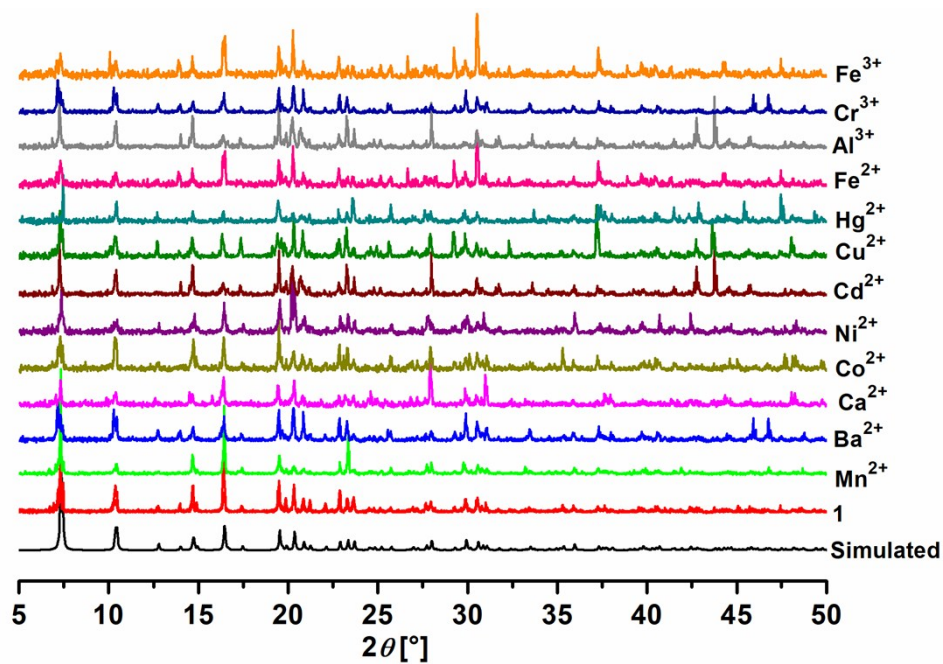

**Fig. S8** Powder X-ray diffraction (PXRD) pattern of complex 1 in different cationic aqueous solution.

**Table S1** Comparison of the detecting range, K<sub>sv</sub>, LOD and Media

| Detectors based on Complexes                                                                                                                               | Detecting range of Fe <sup>3+</sup> concentration (mol/L) | K <sub>sv</sub> (L/mol) | LOD (mol/L)          | Media            | Ref       |
|------------------------------------------------------------------------------------------------------------------------------------------------------------|-----------------------------------------------------------|-------------------------|----------------------|------------------|-----------|
| [(CH <sub>3</sub> ) <sub>2</sub> NH <sub>2</sub> ] <sub>2</sub> [Tb(bptc)] <sub>2</sub><br>xsolvents                                                       | 0.0 - 1.0×10 <sup>-4</sup>                                | 2.6×10 <sup>5</sup>     | 1.8×10 <sup>-4</sup> | Ethanol          | 1         |
| [Zn <sub>5</sub> (hfipbb) <sub>4</sub> (trz) <sub>2</sub> (H <sub>2</sub> O) <sub>2</sub> ]                                                                | 0.0 - 1.0×10 <sup>-4</sup>                                | 4.1×10 <sup>5</sup>     | 1.8×10 <sup>-4</sup> | H <sub>2</sub> O | 2         |
| [Cd(Hcbic)] <sub>n</sub>                                                                                                                                   | 0.0 - 1.3×10 <sup>-3</sup>                                | 1.8×10 <sup>5</sup>     | 3.1×10 <sup>-5</sup> | H <sub>2</sub> O | 3         |
| [Eu(Hpzbc) <sub>2</sub> (NO <sub>3</sub> ) <sub>2</sub> ] <sub>2</sub> ·H <sub>2</sub> O                                                                   | 0.0 - 2.2×10 <sup>-4</sup>                                | -----                   | 2.6×10 <sup>-5</sup> | Ethanol          | 4         |
| [Zn <sub>2</sub> (L) <sub>2</sub> (bpe) <sub>2</sub> (H <sub>2</sub> O) <sub>2</sub> ]                                                                     | 0.0 - 1.0×10 <sup>-3</sup>                                | 2.4×10 <sup>3</sup>     | 2.5×10 <sup>-5</sup> | H <sub>2</sub> O | 5         |
| [Eu(IMS1) <sub>2</sub> ] <sub>2</sub> Cl·4H <sub>2</sub> O                                                                                                 | 0.0 - 1.0×10 <sup>-3</sup>                                | 5.9×10 <sup>3</sup>     | 2.3×10 <sup>-5</sup> | H <sub>2</sub> O | This work |
| {[Eu <sub>2</sub> L <sub>1.5</sub> (H <sub>2</sub> O) <sub>2</sub> EtOH]·DMF} <sub>n</sub>                                                                 | 0.0 - 0.5×10 <sup>-3</sup>                                | 2.9×10 <sup>3</sup>     | 1.0×10 <sup>-5</sup> | DMF              | 6         |
| {(Me <sub>2</sub> NH <sub>2</sub> ) <sub>2</sub> [Tb(oba) <sub>2</sub> ] <sub>2</sub> (Hatz) <sub>2</sub> (H <sub>2</sub> O) <sub>1.5</sub> } <sub>n</sub> | 0.0 - 1.0×10 <sup>-4</sup>                                | 3.4 × 10 <sup>4</sup>   | 1.0×10 <sup>-6</sup> | H <sub>2</sub> O | 7         |
| {Eu-HODA(H <sub>2</sub> O) <sub>4</sub> (H <sub>2</sub> O)} <sub>n</sub>                                                                                   | 0.0 - 3.0×10 <sup>-4</sup>                                | 2.1 × 10 <sup>4</sup>   | 1.0×10 <sup>-7</sup> | H <sub>2</sub> O | 8         |

H<sub>4</sub>bptc= tetracarboxylic acid

H<sub>2</sub>hfipbb = 4, 4'-(hexafluoroisopropylidene)bis(benzoic acid), Htrz = 1H-1,2,3-triazole

H<sub>3</sub>cbic = 1-(4-carboxybenz-yl)-1H-benzimidazole-5, 6-dicarboxylic acid

H<sub>2</sub>pzbc = 3-(1H-pyrazol-3-yl) benzoic acid

L = 4,4'-((1,2- phenylenebis(methylene))bis(oxy))dibenzoic acid

bpe = (E)-1,2-di(pyridin-4-yl)ethene

L = 5, 5'-(carbonyl-bis(azanediyl))diisophthalic acid

H<sub>2</sub>oba = 4, 4'-oxybis(benzoate), Hatz = 3-amino-1,2,4-triazole

H<sub>4</sub>ODA = 2, 2', 3, 3'-Oxidiphthalic acid

[1] X.- L. Zhao, D. Tian, Q. Gao, H.- W. Sun, J. Xu, X.- H. Bu, Dalton Trans. 2016, **45**, 1040-1046.

[2] B.- L. Hou, D. Tian and Y. - Q. Lan, Inorg. Chem. 2016, **55**, 10580-10586.

[3] F. - F. Li, M. - L. Zhu, L. - P. Lu, Journal of Solid State Chemistry, 2018, **261**, 31-36.

[4] G. - P. Li, G. Liu, Y.- Z. Li, L. Hou, Y.- Y. Wang, and Z.- H. Zhu, Inorg. Chem. 2016, **55**, 3952–3959.

[5] F.- L. Hu, Y.- X. Shi, H. - H. Chen and J. - P. Lang, Dalton Trans. 2015, 44, 18795-18803.

[6] W. Liu, X. Huang, C. Xu, C. - Y. Chen, L. - Z. Yang, W. Dou, W. - M. Chen, H. Yang, W. - S. Liu, Chem. Eur. J. 2016, **22**, 1-9.

[7] D. - M. Chen, N. - N. Zhang, C. - S. Liu and M. Du, J. Mater. Chem. C, 2015, **2**, 1-7.

[8] J. Wang, M. Jiang, L. Yan, Inorg. Chem, 2016, **55**, 12660-12668.

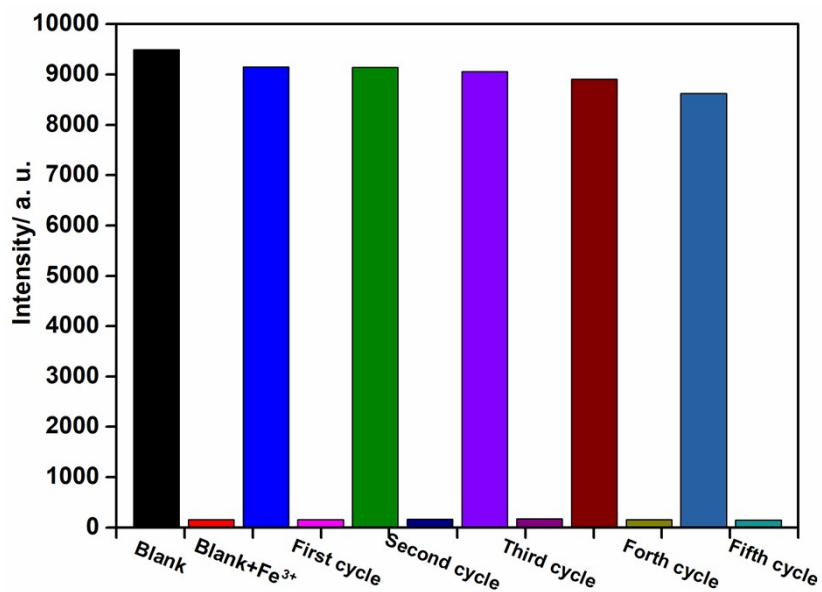

**Fig. S9** The reversibility test for sensing Fe<sup>3+</sup>. The luminescence intensity of **1**, recycled **1** and Fe<sup>3+</sup>@**1**.

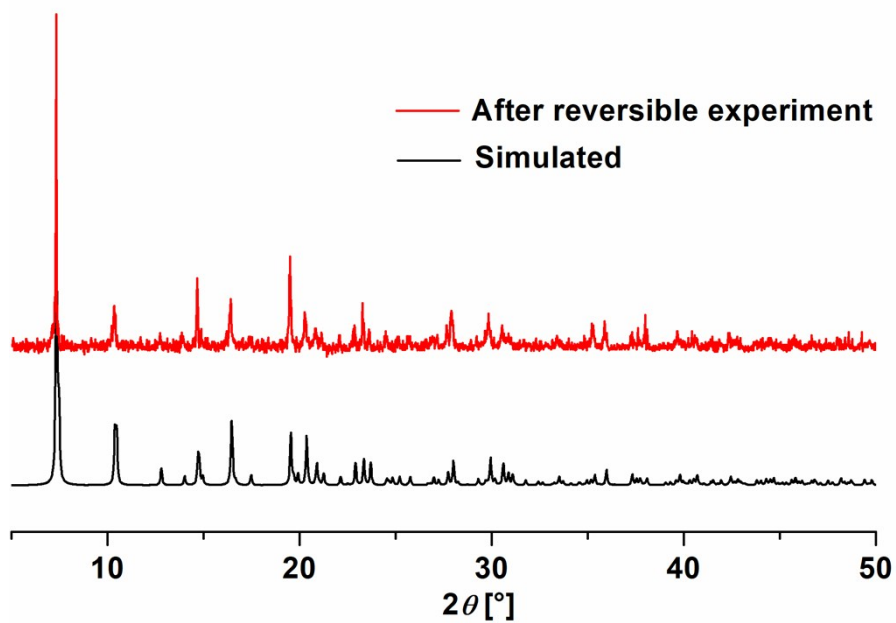

**Fig. S10** The PXRD pattern of **1** after five sensing-recovery circles.

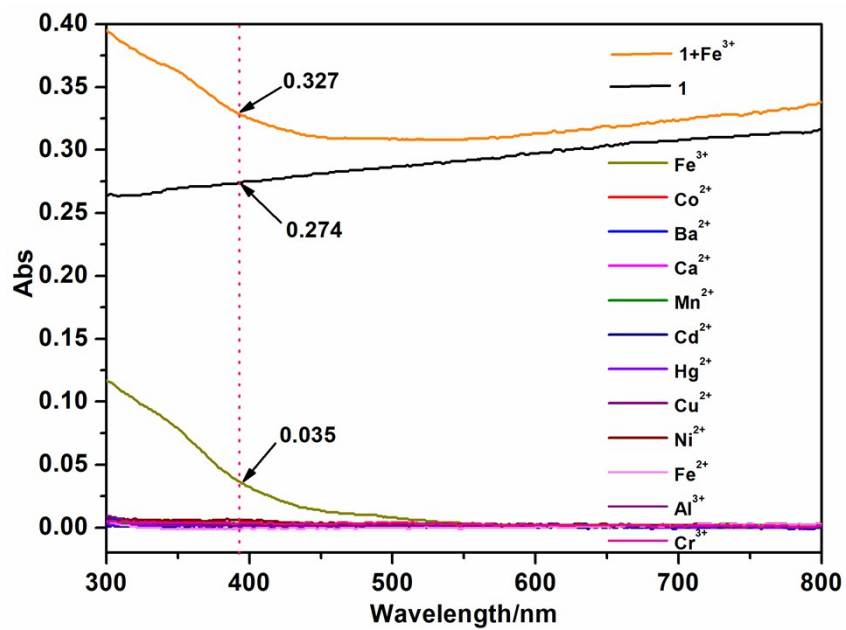

**Fig. S11** Absorption spectra of water-solution containing Fe<sup>3+</sup> and other metal ions (10<sup>-4</sup> M), suspension of complex **1** and suspension of complex **1** with Fe<sup>3+</sup>.
